# Supplementary material for: A density functional study of silver clusters on a stepped graphite surface: formation of self-assembled nano-wires
Source: Royal Society of Chemistry journal article supplement (doi:10.1039/c5cp01016k), 2015-01-01
Supplement: c5cp01016k6.pdf [file c5cp01016k6.pdf]

Supplementary Information  
Self-assembly of silver nano-wires along the step-edge of  
graphite

Akansha Singh and Prasenjit Sen

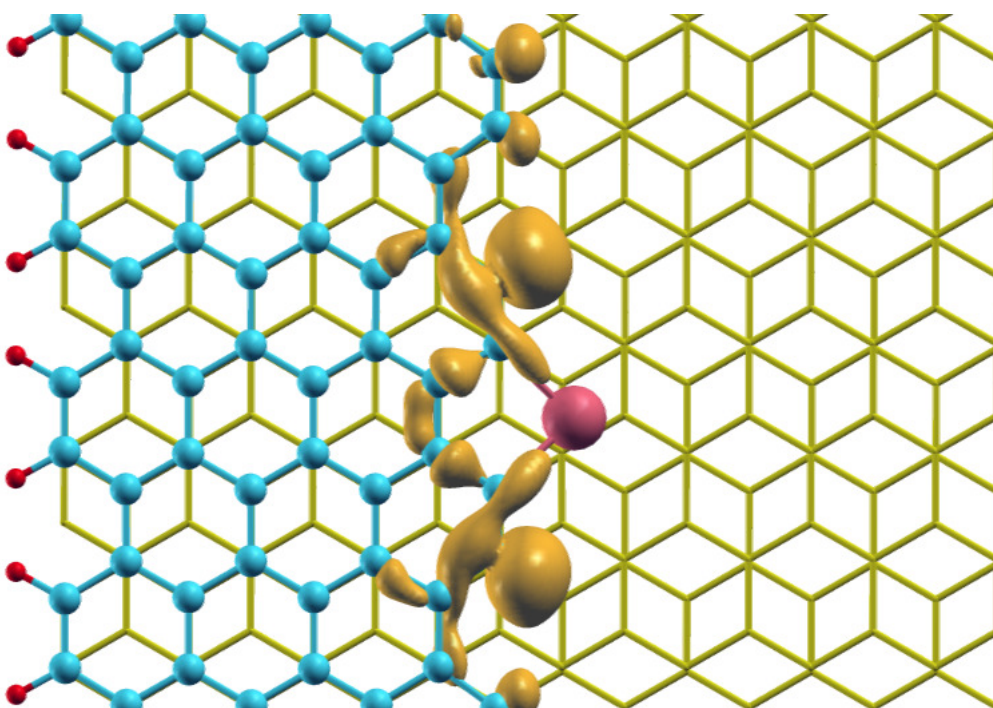

Figure S1: Partial (band decomposed) charge density isosurface plot for a silver adatom bonded at an 'active site' of an armchair step edge on HOPG. Top (half) layer C atoms are marked in blue.

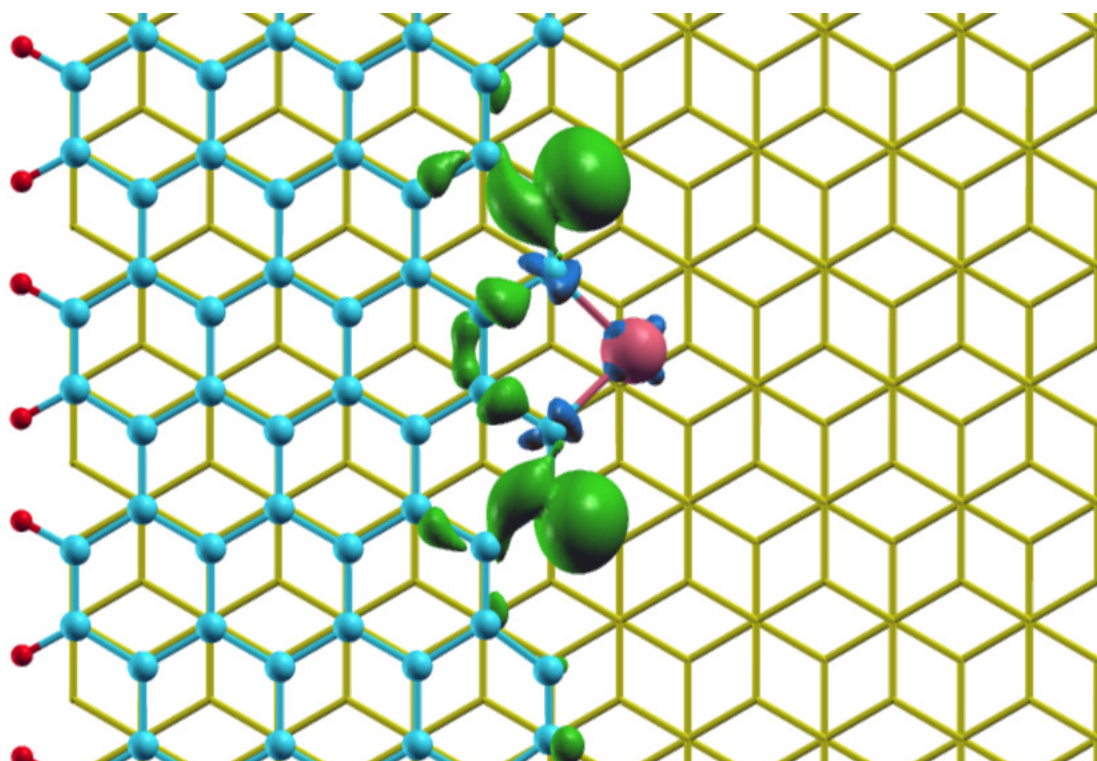

Figure S2: Spin density isosurface plot for a silver adatom bonded at an ‘active site’ of an armchair step edge on HOPG.

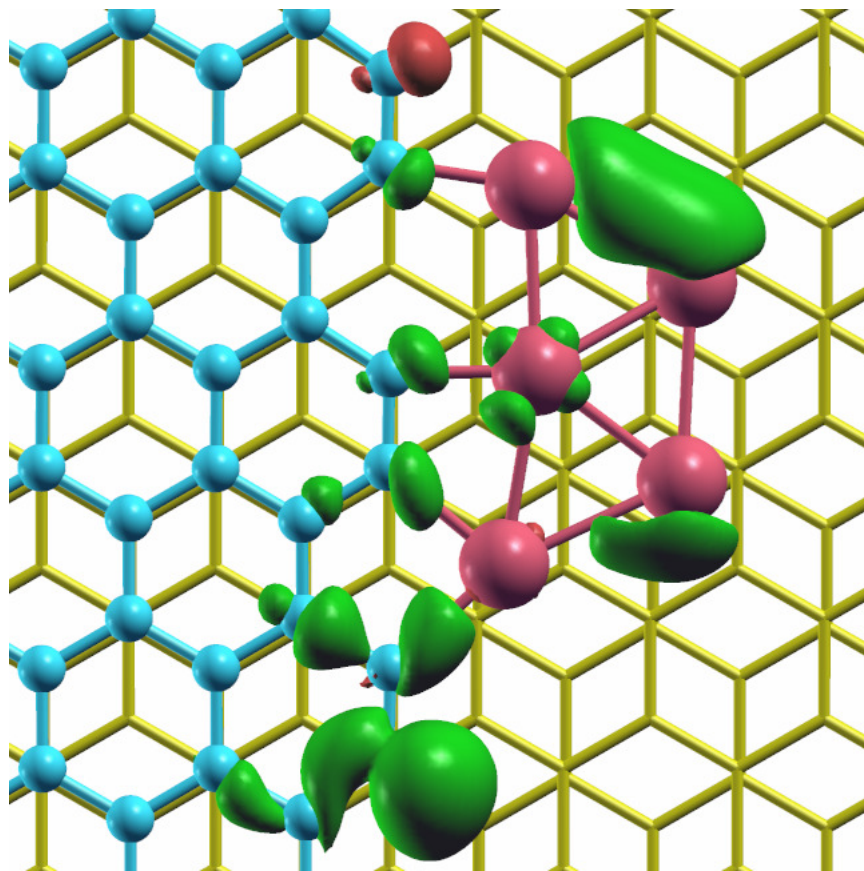

Figure S3: Spin density isosurface plot for the  $\text{Ag}_5$  cluster bonded at the armchair step edge on HOPG.
